# Supplementary material
Source: PubMed Central journal article supplement (PMC6879279)
Supplement: JCM.01127-19-s0001.pdf [file JCM.01127-19-s0001.pdf]

**Evaluation of the Direct MacConkey Method for Identification of Carbapenem-Resistant Gram-Negative Organisms from Rectal Swabs: Re-evaluating Zone Diameter Cutoffs**

Meklit Workneh<sup>1</sup>, Ruibin Wang<sup>2</sup>, Abida Q. Kazmi<sup>1</sup>, Krizia K. Chambers<sup>1</sup>, Belita N.A. Opene<sup>1</sup>, Shawna Lewis<sup>1</sup>, Katherine Goodman<sup>3</sup>, Pranita D. Tamma<sup>4</sup>, Karen C. Carroll<sup>1</sup>, Aaron M. Milstone<sup>4,5</sup> and Patricia J. Simner<sup>1</sup> for the CDC Prevention Epicenters Program

<sup>1</sup>Division of Medical Microbiology, Johns Hopkins School of Medicine, <sup>2</sup>Harvard University, School of Public Health, Cambridge, MA, <sup>3</sup>University of Maryland School of Medicine, <sup>4</sup>Division of Pediatric Infectious Diseases, Johns Hopkins School of Medicine, Baltimore, MD, <sup>5</sup>Department of Epidemiology and Public Health, Baltimore, MD Johns Hopkins University Bloomberg School of Public Health, Department of Epidemiology, Baltimore, MD

**Supplemental Materials Tables 1 and 2**

**Supplemental Table 1: Sensitivity and Specificity of Various Ertapenem Zone Diameter Cutoffs for the Detection of Different Carbapenem-Resistant Organism Groups**

| ZD                 | CRO                        |      | CRE                        |      | CR-NF                      |      | CPO                        |      | CPE                        |      | CP-NF                      |      |
|--------------------|----------------------------|------|----------------------------|------|----------------------------|------|----------------------------|------|----------------------------|------|----------------------------|------|
|                    | Sens                       | Spec |
| 6                  | 30%                        | 99%  | 20%                        | 97%  | 44%                        | 98%  | 43%                        | 97%  | 45%                        | 96%  | 43%                        | 96%  |
| ≤7                 | 30%                        | 99%  | 20%                        | 97%  | 45%                        | 98%  | 43%                        | 97%  | 45%                        | 96%  | 44%                        | 96%  |
| ≤8                 | 31%                        | 99%  | 21%                        | 96%  | 46%                        | 98%  | 44%                        | 96%  | 46%                        | 96%  | 45%                        | 96%  |
| ≤9                 | 33%                        | 99%  | 22%                        | 96%  | 49%                        | 98%  | 46%                        | 96%  | 47%                        | 96%  | 48%                        | 96%  |
| ≤10                | 36%                        | 99%  | 24%                        | 96%  | 54%                        | 97%  | 50%                        | 96%  | 48%                        | 95%  | 53%                        | 95%  |
| ≤11                | 38%                        | 99%  | 26%                        | 95%  | 57%                        | 97%  | 51%                        | 95%  | 49%                        | 95%  | 55%                        | 95%  |
| ≤12                | 41%                        | 98%  | 28%                        | 95%  | 60%                        | 97%  | 53%                        | 95%  | 50%                        | 94%  | 58%                        | 94%  |
| ≤13                | 43%                        | 98%  | 30%                        | 95%  | 61%                        | 96%  | 55%                        | 94%  | 51%                        | 93%  | 61%                        | 94%  |
| ≤14                | 45%                        | 98%  | 32%                        | 94%  | 64%                        | 96%  | 58%                        | 94%  | 53%                        | 93%  | 65%                        | 93%  |
| ≤15                | 49%                        | 97%  | 36%                        | 94%  | 68%                        | 95%  | 63%                        | 93%  | 58%                        | 92%  | 70%                        | 92%  |
| ≤16                | 51%                        | 97%  | 38%                        | 93%  | 70%                        | 95%  | 66%                        | 93%  | 61%                        | 92%  | 72%                        | 92%  |
| ≤17                | 53%                        | 97%  | 41%                        | 93%  | 71%                        | 94%  | 68%                        | 92%  | 65%                        | 91%  | 72%                        | 91%  |
| ≤18                | 56%                        | 96%  | 44%                        | 92%  | 74%                        | 94%  | 70%                        | 92%  | 68%                        | 91%  | 73%                        | 91%  |
| ≤19                | 59%                        | 96%  | 48%                        | 92%  | 75%                        | 93%  | 72%                        | 91%  | 71%                        | 90%  | 73%                        | 90%  |
| ≤20                | 66%                        | 94%  | 56%                        | 90%  | 81%                        | 91%  | 79%                        | 89%  | 77%                        | 88%  | 81%                        | 88%  |
| ≤21                | 70%                        | 94%  | 60%                        | 89%  | 84%                        | 90%  | 80%                        | 88%  | 79%                        | 87%  | 81%                        | 87%  |
| ≤22                | 75%                        | 92%  | 66%                        | 88%  | 87%                        | 88%  | 85%                        | 86%  | 84%                        | 85%  | 86%                        | 85%  |
| ≤23                | 78%                        | 90%  | 70%                        | 86%  | 90%                        | 86%  | 87%                        | 84%  | 87%                        | 83%  | 86%                        | 83%  |
| ≤24                | 82%                        | 88%  | 75%                        | 84%  | 91%                        | 84%  | 91%                        | 82%  | 92%                        | 81%  | 88%                        | 80%  |
| ≤25                | 92%                        | 83%  | 88%                        | 78%  | 96%                        | 78%  | 95%                        | 76%  | 96%                        | 74%  | 93%                        | 74%  |
| ≤26                | 97%                        | 78%  | 96%                        | 74%  | 98%                        | 73%  | 98%                        | 71%  | 98%                        | 70%  | 97%                        | 70%  |
| AUC<br>(95%<br>CI) | 0.932<br>(0.924-<br>0.941) |      | 0.879<br>(0.866-<br>0.892) |      | 0.942<br>(0.931-<br>0.952) |      | 0.920<br>(0.904-<br>0.935) |      | 0.914<br>(0.894-<br>0.935) |      | 0.913<br>(0.889-<br>0.936) |      |

**Supplemental Table 2: Sensitivity and Specificity of Various Meropenem Zone Diameter Cutoffs for the Detection of Different Carbapenem-Resistant Organism Groups**

| ZD                 | CRO                        |      | CRE                        |      | CR-NF                      |      | CPO                        |      | CPE                        |      | CP-NF                      |      |
|--------------------|----------------------------|------|----------------------------|------|----------------------------|------|----------------------------|------|----------------------------|------|----------------------------|------|
|                    | Sens                       | Spec |
| 6                  | 10%                        | 100% | 9%                         | 99%  | 14%                        | 99%  | 29%                        | 100% | 30%                        | 99%  | 31%                        | 99%  |
| ≤8                 | 11%                        | 100% | 10%                        | 99%  | 15%                        | 99%  | 30%                        | 100% | 30%                        | 99%  | 34%                        | 99%  |
| ≤10                | 12%                        | 100% | 11%                        | 99%  | 17%                        | 99%  | 33%                        | 100% | 32%                        | 99%  | 36%                        | 99%  |
| ≤11                | 13%                        | 100% | 11%                        | 99%  | 17%                        | 99%  | 33%                        | 99%  | 33%                        | 99%  | 36%                        | 99%  |
| ≤12                | 14%                        | 100% | 13%                        | 99%  | 19%                        | 99%  | 36%                        | 99%  | 37%                        | 99%  | 38%                        | 99%  |
| ≤13                | 15%                        | 100% | 13%                        | 99%  | 21%                        | 99%  | 37%                        | 99%  | 37%                        | 99%  | 41%                        | 99%  |
| ≤14                | 16%                        | 100% | 14%                        | 99%  | 21%                        | 99%  | 39%                        | 99%  | 37%                        | 99%  | 43%                        | 99%  |
| ≤15                | 18%                        | 100% | 15%                        | 99%  | 24%                        | 99%  | 39%                        | 99%  | 38%                        | 98%  | 43%                        | 98%  |
| ≤16                | 19%                        | 100% | 17%                        | 99%  | 25%                        | 99%  | 43%                        | 99%  | 43%                        | 98%  | 45%                        | 98%  |
| ≤17                | 21%                        | 100% | 18%                        | 98%  | 27%                        | 99%  | 44%                        | 99%  | 44%                        | 98%  | 48%                        | 98%  |
| ≤18                | 22%                        | 99%  | 19%                        | 98%  | 28%                        | 99%  | 45%                        | 98%  | 45%                        | 98%  | 49%                        | 98%  |
| ≤19                | 24%                        | 99%  | 20%                        | 98%  | 32%                        | 98%  | 47%                        | 98%  | 45%                        | 98%  | 51%                        | 98%  |
| ≤20                | 29%                        | 99%  | 24%                        | 97%  | 38%                        | 98%  | 52%                        | 97%  | 50%                        | 97%  | 56%                        | 97%  |
| ≤21                | 30%                        | 99%  | 25%                        | 97%  | 40%                        | 98%  | 52%                        | 97%  | 51%                        | 97%  | 56%                        | 97%  |
| ≤22                | 34%                        | 99%  | 28%                        | 97%  | 45%                        | 97%  | 54%                        | 97%  | 52%                        | 96%  | 58%                        | 96%  |
| ≤23                | 35%                        | 99%  | 29%                        | 97%  | 46%                        | 97%  | 55%                        | 96%  | 54%                        | 96%  | 58%                        | 96%  |
| ≤24                | 39%                        | 98%  | 32%                        | 96%  | 51%                        | 96%  | 58%                        | 95%  | 56%                        | 95%  | 62%                        | 95%  |
| ≤25                | 44%                        | 97%  | 37%                        | 95%  | 54%                        | 95%  | 64%                        | 95%  | 64%                        | 94%  | 66%                        | 94%  |
| ≤26                | 50%                        | 96%  | 45%                        | 93%  | 58%                        | 93%  | 71%                        | 93%  | 71%                        | 92%  | 71%                        | 92%  |
| ≤27                | 53%                        | 95%  | 49%                        | 93%  | 60%                        | 93%  | 72%                        | 92%  | 73%                        | 91%  | 71%                        | 91%  |
| ≤28                | 61%                        | 92%  | 57%                        | 89%  | 66%                        | 89%  | 79%                        | 88%  | 81%                        | 87%  | 78%                        | 87%  |
| ≤29                | 63%                        | 91%  | 59%                        | 89%  | 68%                        | 88%  | 81%                        | 87%  | 83%                        | 87%  | 79%                        | 86%  |
| ≤30                | 83%                        | 83%  | 82%                        | 80%  | 85%                        | 79%  | 91%                        | 78%  | 90%                        | 77%  | 92%                        | 77%  |
| ≤31                | 85%                        | 82%  | 83%                        | 79%  | 88%                        | 78%  | 92%                        | 77%  | 91%                        | 76%  | 92%                        | 76%  |
| AUC<br>(95%<br>CI) | 0.869<br>(0.853-<br>0.885) |      | 0.836<br>(0.815-<br>0.857) |      | 0.871<br>(0.849-<br>0.894) |      | 0.908<br>(0.884-<br>0.933) |      | 0.902<br>(0.867-<br>0.936) |      | 0.903<br>(0.867-<br>0.939) |      |
